# Supplementary material for: Second Chance in Education: Principles and Rituals.
Source: MDPI journal article supplement (doi:10.3390/pathogens11111241), 1995-01-01
Supplement: s1 [file s1]

## Supplementary Files

**Table S1.** Chi-Square Test of Independence on SFGR ELISA Serology and Parasite Infections.

|                                              | <b>X<sup>2</sup> Test Statistic</b> | <b>X<sup>2</sup> <i>p</i>-value</b> | <b>Fisher' Exact Test Probability</b> |
|----------------------------------------------|-------------------------------------|-------------------------------------|---------------------------------------|
| Positive for at least one ELISA (IgG or IgM) |                                     |                                     |                                       |
| Chagas disease positive <sup>1</sup>         | 3.48                                | --                                  | 0.0744                                |
| Any GI parasite positive <sup>1</sup>        | 0.0008                              | --                                  | 1.0000                                |
| Febrile                                      | 3.02                                | 0.082                               | 0.0959                                |
| IgG Positive                                 |                                     |                                     |                                       |
| Chagas disease positive <sup>1</sup>         | 5.15                                | --                                  | 0.0785                                |
| Any GI parasite positive <sup>1</sup>        | 0.74                                | --                                  | 0.4265                                |
| Febrile                                      | 0.71                                | 0.398                               | 0.5316                                |
| IgM Positive                                 |                                     |                                     |                                       |
| Chagas disease positive <sup>1</sup>         | 1.53                                | --                                  | 0.1981                                |
| Any GI parasite positive <sup>1</sup>        | 0.21                                | --                                  | 1.00                                  |
| Febrile                                      | 2.28                                | 0.131                               | 0.1572                                |

<sup>1</sup> At least one cell had expected counts less than 5; thus, Fisher's exact test probability is provided.
